# Supplementary material for: Biohybrid nanostructured ceria/glucose oxidase electrodes enabling enzyme glucose oxidation with pseudocapacitive charge buffering
Source: Royal Society of Chemistry journal article supplement (doi:10.1039/d6ra01081d), 2026-04-27
Supplement: d6ra01081d1.pdf [file d6ra01081d1.pdf]

## Supplementary information

### **Biohybrid Nanostructured Ceria/Glucose Oxidase Electrodes Enabling Enzyme Glucose Oxidation with Pseudocapacitive Charge Buffering**

Mohamed Mohamedi\* and Mouna Moumene

Institut National de la Recherche Scientifique (INRS)-Énergie, Matériaux et Télécommunications  
(EMT), 1650 Boulevard Lionel Boulet, Varennes, Québec, J3X 1P7, Canada.

\*E-mail: [Mohamed.Mohamedi@inrs.ca](mailto:Mohamed.Mohamedi@inrs.ca)

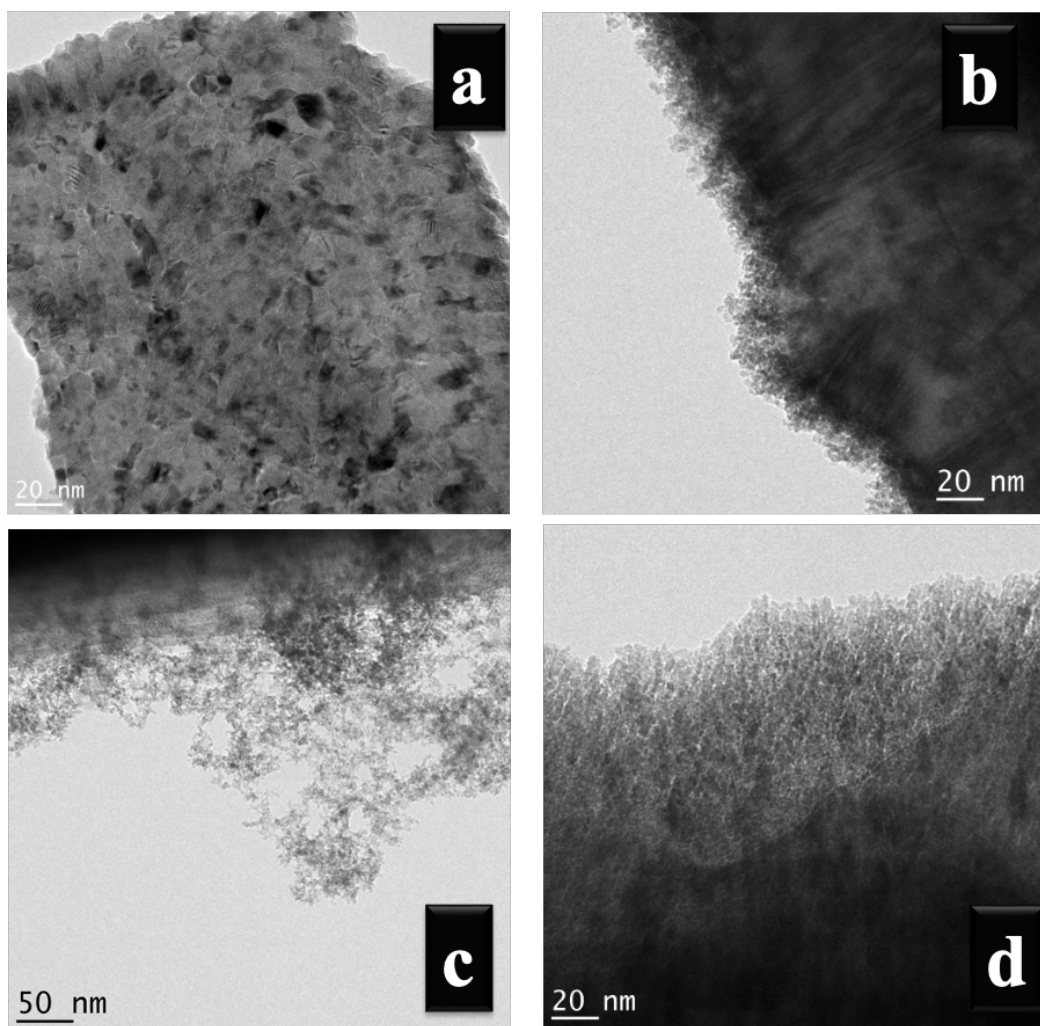

**Figure S1** TEM images of PLD-grown  $\text{CeO}_2$  film deposited on carbon paper under different atmospheres. (a)  $(\text{CeO}_2)_{\text{UV}}$ , (b)  $(\text{CeO}_2)_{0.5\text{The}}$ , (c)  $(\text{CeO}_2)_{2\text{The}}$  and (d)  $(\text{CeO}_2)_{10\text{mTO}_2}$ .

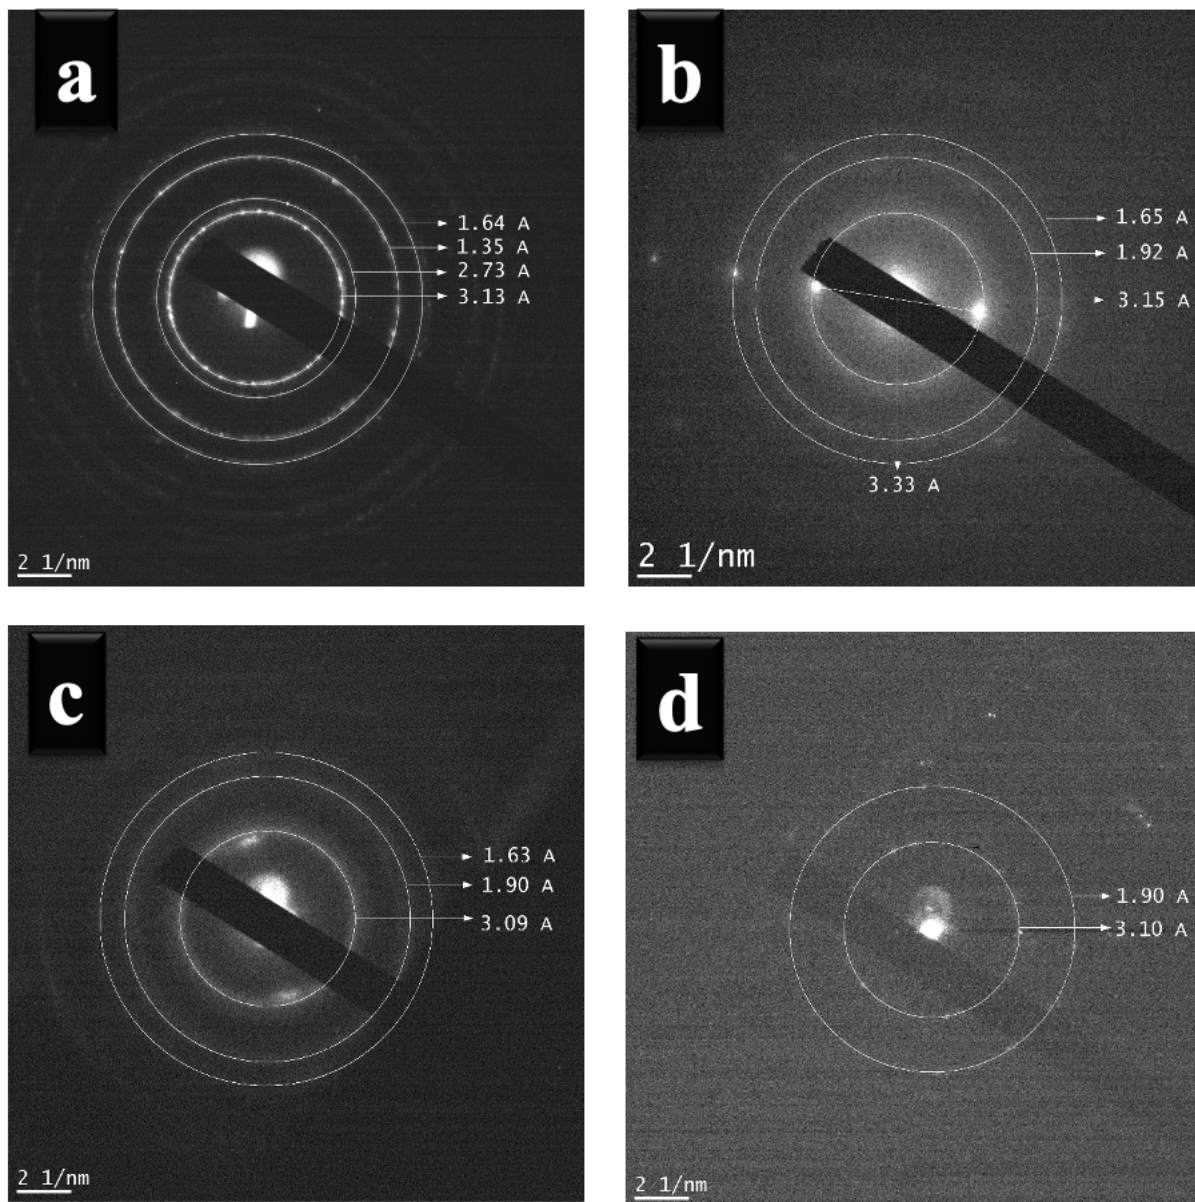

**Figure S2** SAED patterns of PLD-deposited  $\text{CeO}_2$  films prepared under different atmospheres: (a)  $(\text{CeO}_2)_{\text{UV}}$ , (b)  $(\text{CeO}_2)_{0.5\text{THe}}$ , (c)  $(\text{CeO}_2)_{2\text{THe}}$ , and (d)  $(\text{CeO}_2)_{10\text{mTO}_2}$ .

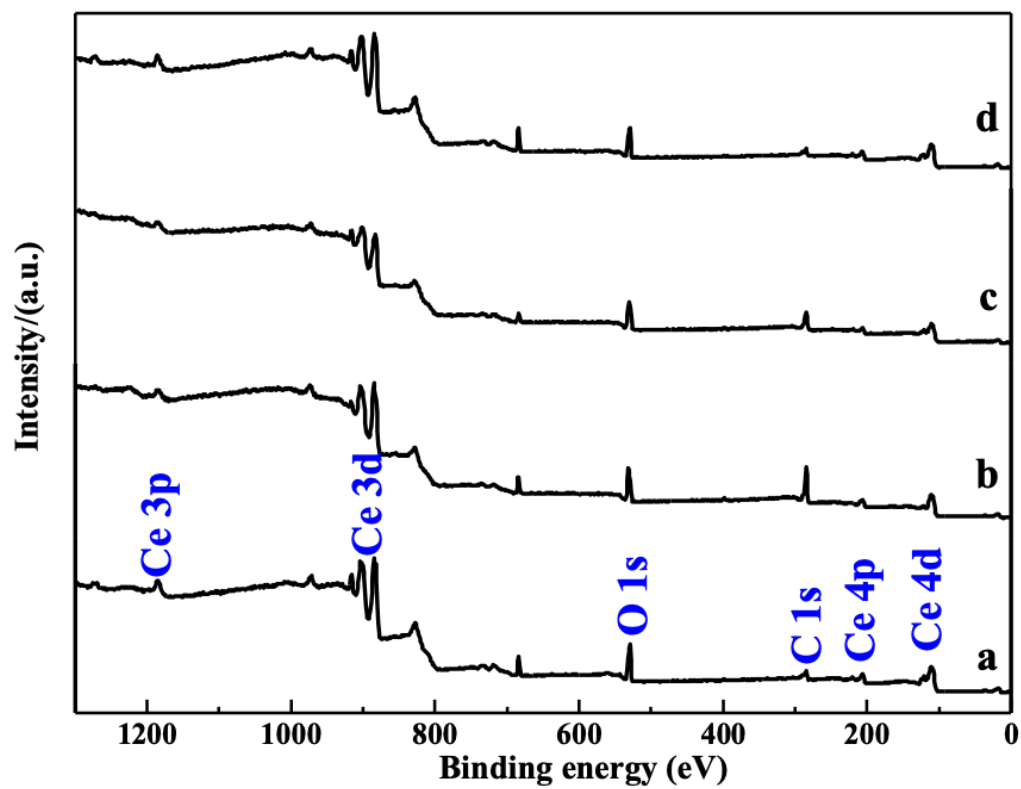

**Figure S3** PLD-grown CeO<sub>2</sub> film deposited on carbon paper under different atmospheres. (a) (CeO<sub>2</sub>)<sub>UV</sub>, (b) (CeO<sub>2</sub>)<sub>0.5THe</sub>, (c) (CeO<sub>2</sub>)<sub>2THe</sub> and (d) (CeO<sub>2</sub>)<sub>10mTO2</sub>.

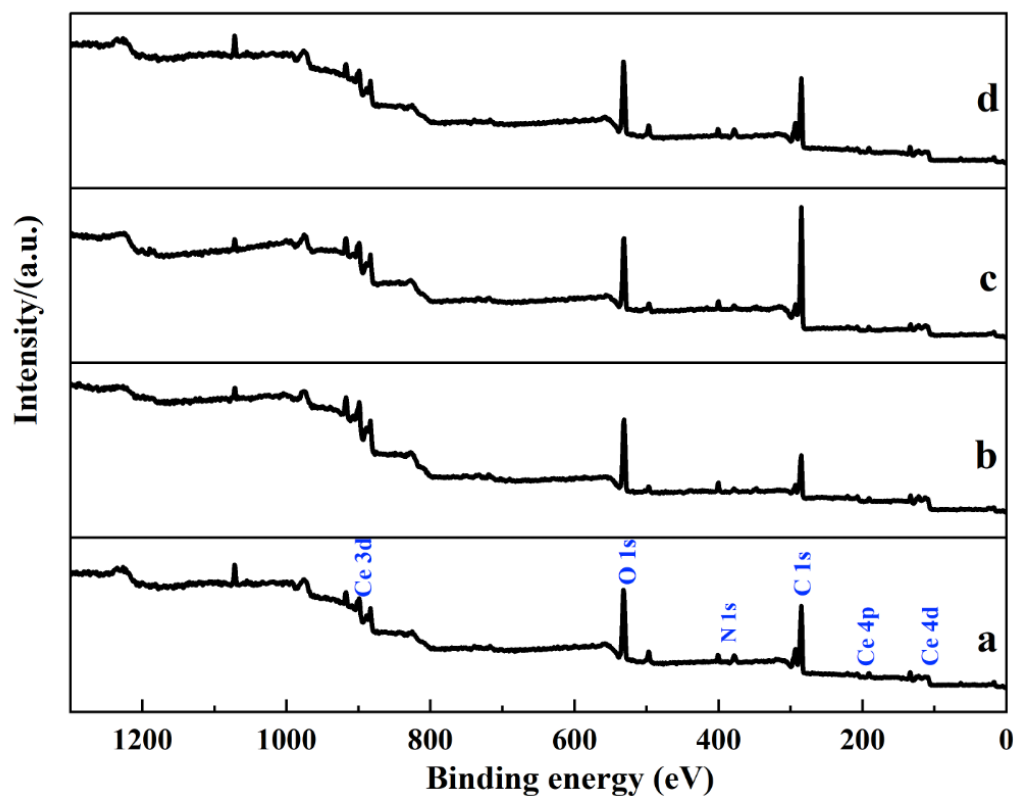

**Figure S4** XPS survey spectra of GOx immobilized onto CeO<sub>2</sub>. (a) (CeO<sub>2</sub>)<sub>UV</sub>/GOx, (b) (CeO<sub>2</sub>)<sub>0.5TH<sub>2</sub></sub>/GOx, (c) (CeO<sub>2</sub>)<sub>2TH<sub>2</sub></sub>/GOx and (d) (CeO<sub>2</sub>)<sub>10mTO<sub>2</sub></sub>/GOx.

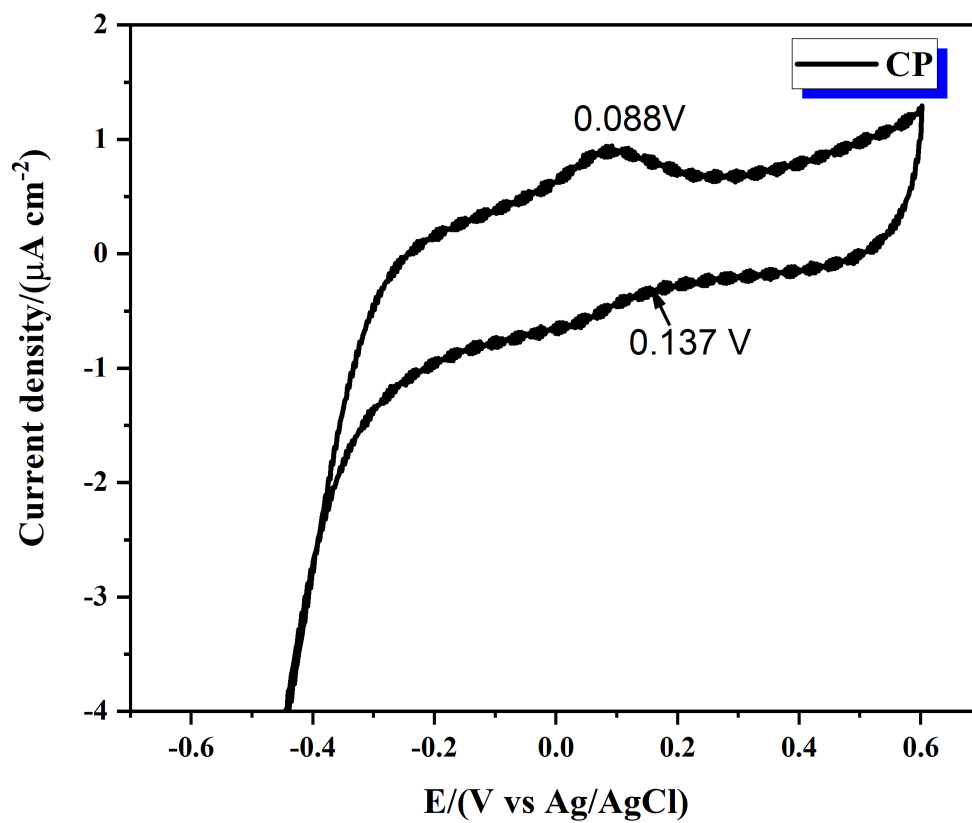

**Figure S5** Cyclic voltammogram of bare carbon paper (CP) substrate recorded in PBS solution at a scan rate of  $20 \text{ mV s}^{-1}$ .

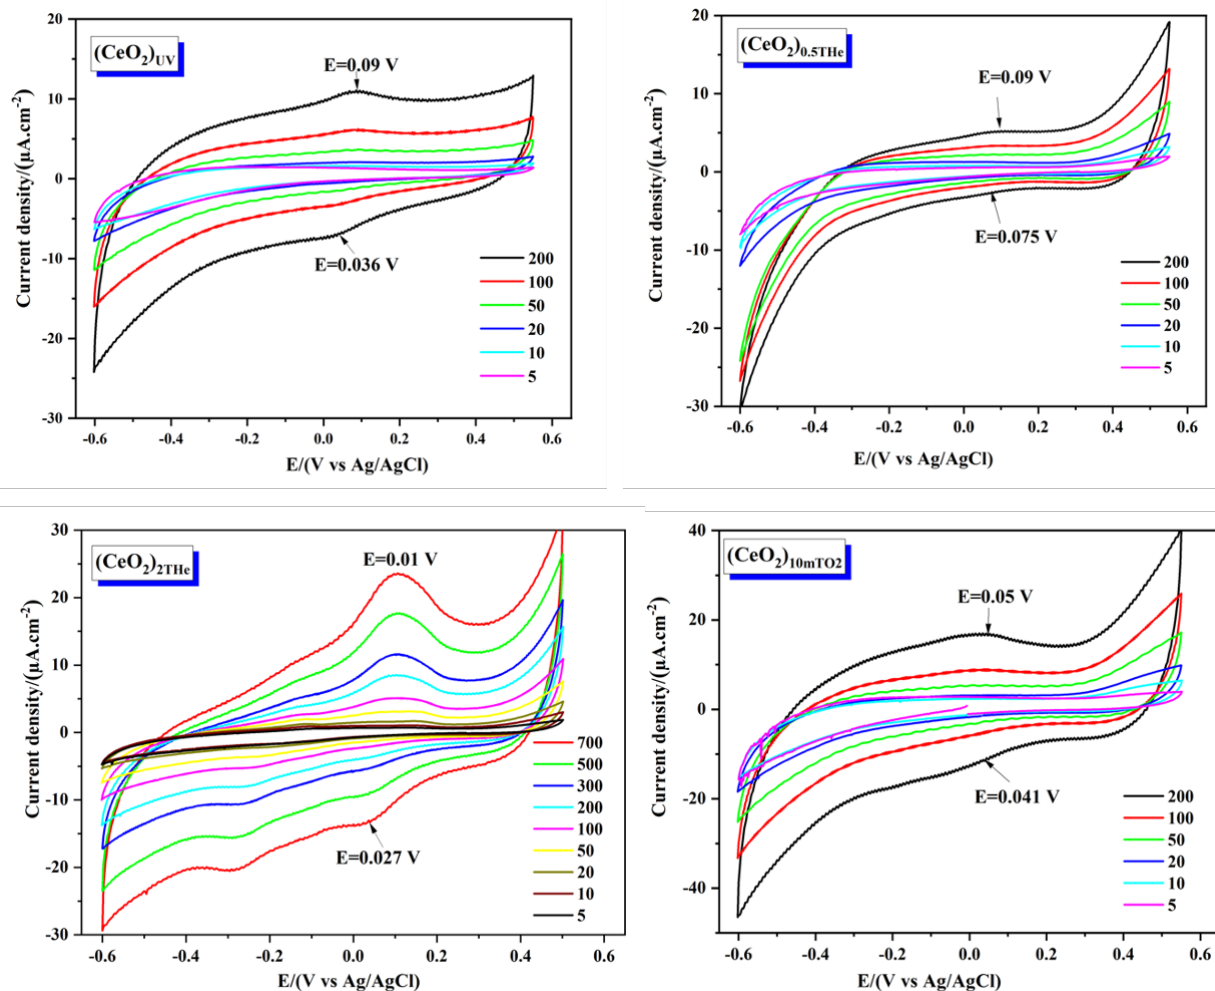

**Figure S6** Cyclic voltammograms of CeO<sub>2</sub> electrodes recorded in PBS solution at different scan rates. Scan rates ( $\text{mV}\cdot\text{s}^{-1}$ ) are visible in the legend. The CVs correspond to CeO<sub>2</sub> films deposited under different PLD atmospheres, as indicated in each graph.

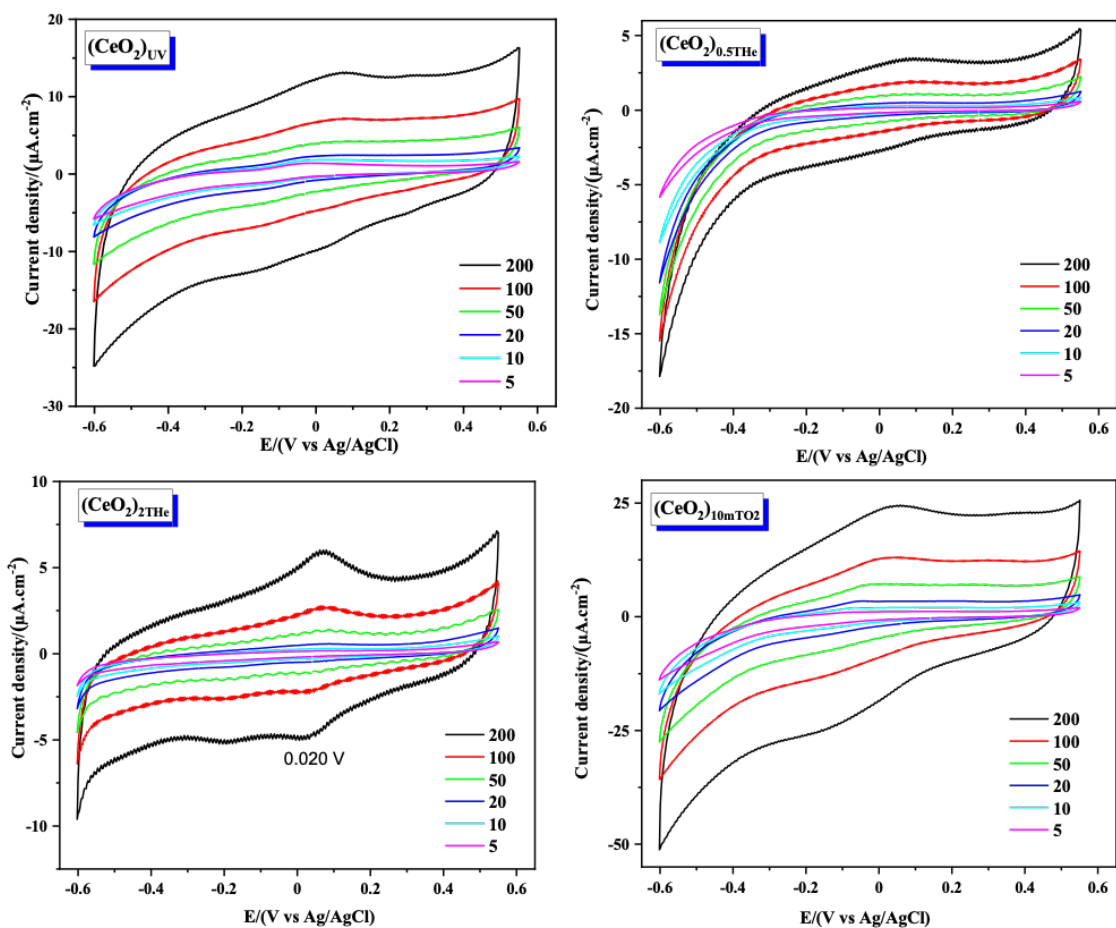

**Figure S7** Cyclic voltammograms of  $\text{CeO}_2$  electrodes recorded in PBS containing 4 mM glucose solution at different scan rates. Scan rates ( $\text{mV}\cdot\text{s}^{-1}$ ) are visible in the legend. The CVs correspond to  $\text{CeO}_2$  films deposited under different PLD atmospheres, as indicated in each graph.

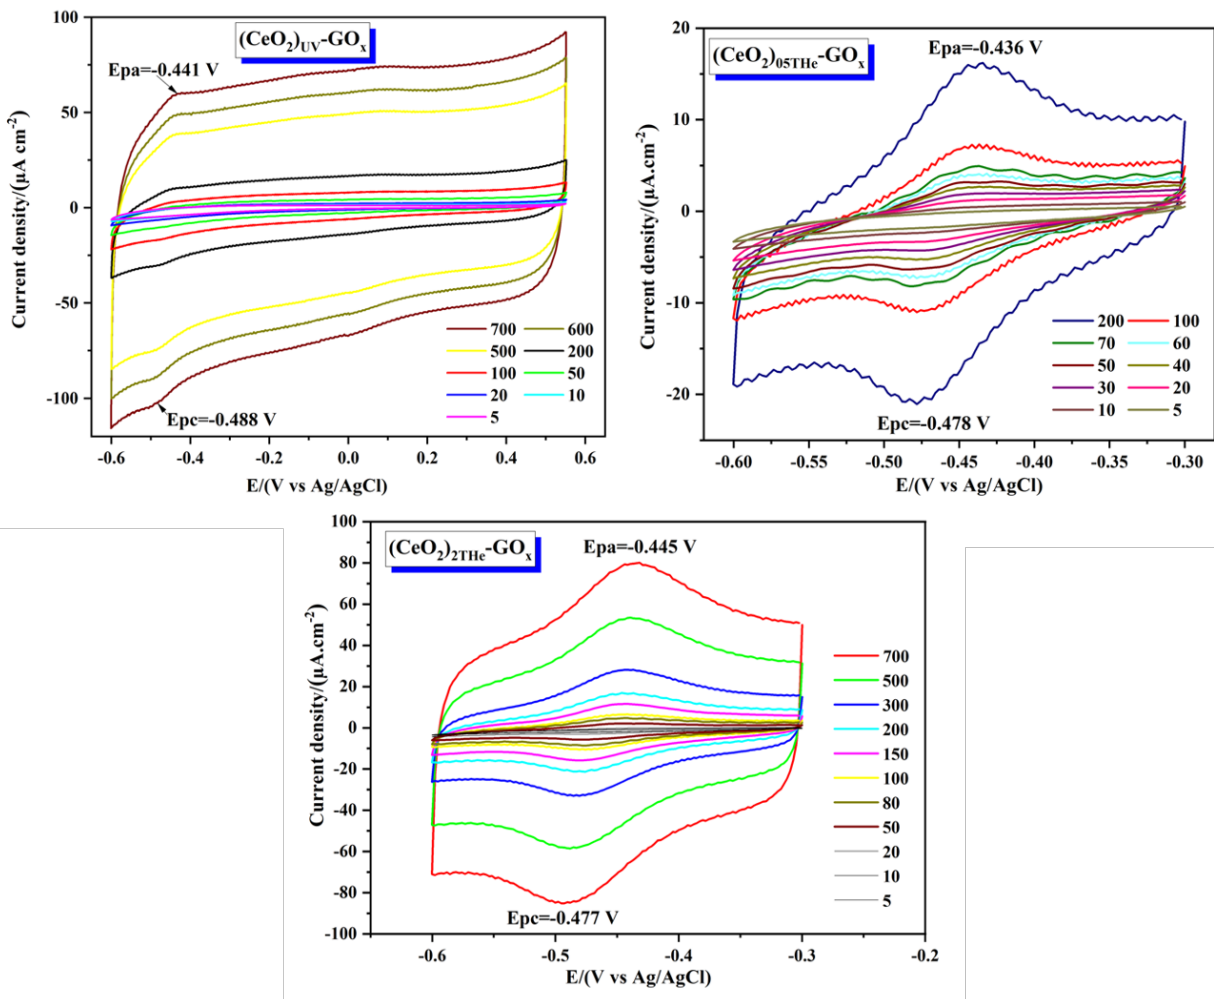

**Figure S8** Cyclic voltammograms of  $\text{CeO}_2$ -GOx electrodes recorded in PBS solution in the absence of glucose at varying scan rates. Scan rates ( $\text{mV s}^{-1}$ ) are visible in the legend. The CVs correspond to  $\text{CeO}_2$  films deposited under different PLD atmospheres, as indicated in each graph. Data for  $(\text{CeO}_2)_{10\text{mTO}_2}\text{-GO}_x$  are not included due to data unavailability.

**Table S1.** Surface compositional parameters extracted from XPS analysis of PLD-grown CeO<sub>2</sub> films deposited under different background atmospheres. Ce<sup>3+</sup>/Ce<sup>4+</sup> ratios and oxygen-related components were quantified from deconvolution of Ce 3d and O 1s spectra, respectively.

| Samples                               | [Ce <sup>3+</sup> ]/[Ce] <sub>total</sub> | [Ce <sup>4+</sup> ]/[Ce] <sub>total</sub> | [Ce <sup>3+</sup> ]/[Ce <sup>4+</sup> ] | [O <sup>2-</sup> ] | [Ce] | [Ce]/[O <sup>2-</sup> ] |
|---------------------------------------|-------------------------------------------|-------------------------------------------|-----------------------------------------|--------------------|------|-------------------------|
| (CeO <sub>2</sub> ) <sub>UV</sub>     | 66.3                                      | 33.7                                      | 1.96                                    | 25.3               | 28.1 | 1.11                    |
| (CeO <sub>2</sub> ) <sub>0.5THe</sub> | 70.1                                      | 29.9                                      | 2.34                                    | 8.00               | 15.8 | 1.97                    |
| (CeO <sub>2</sub> ) <sub>2THe</sub>   | 71.3                                      | 28.7                                      | 2.48                                    | 12.7               | 17.3 | 1.36                    |
| (CeO <sub>2</sub> ) <sub>10mTO2</sub> | 56.6                                      | 43.4                                      | 1.30                                    | 21.3               | 35.8 | 1.68                    |
